# Supplementary material for: Illumina sequencing of the chloroplast genome of common ragweed (Ambrosia artemisiifolia L.)
Source: PubMed Central journal article supplement (PMC5655400; doi:10.1016/j.dib.2017.10.009), 2017-10-07
Supplement: mmc1.pdf [file mmc1.pdf]

## Conflicts of Interest Statement

**Manuscript title:** Illumina sequencing of the chloroplast genome of common ragweed (*Ambrosia artemisiifolia* L.)

The authors whose names are listed immediately below certify that they have NO affiliations with or involvement in any organization or entity with any financial interest (such as honoraria; educational grants; participation in speakers' bureaus; membership, employment, consultancies, stock ownership, or other equity interest; and expert testimony or patent-licensing arrangements), or non-financial interest (such as personal or professional relationships, affiliations, knowledge or beliefs) in the subject matter or materials discussed in this manuscript.

Authors:

Dr. Eszter Virág

Erzsébet Nagy

Géza Hegedűs

Dr. János Taller

Barbara Kutasy

We declare, that we have no conflict of interest.

### Name and signature



Erzsébet Nagy



Dr. Taller János



Barbara Kutasy



Géza Hegedűs

Nel Dr Virág E.A.

Dr. Eszter Virág

Corresponding author

21/09/2017
